# Supplementary material
Source: PubMed Central journal article supplement (PMC4854682)
Supplement: supp_pp.15.01814_PP2015-01814R1_Supplemental_Material.pdf [file supp_pp.15.01814_PP2015-01814R1_Supplemental_Material.pdf]

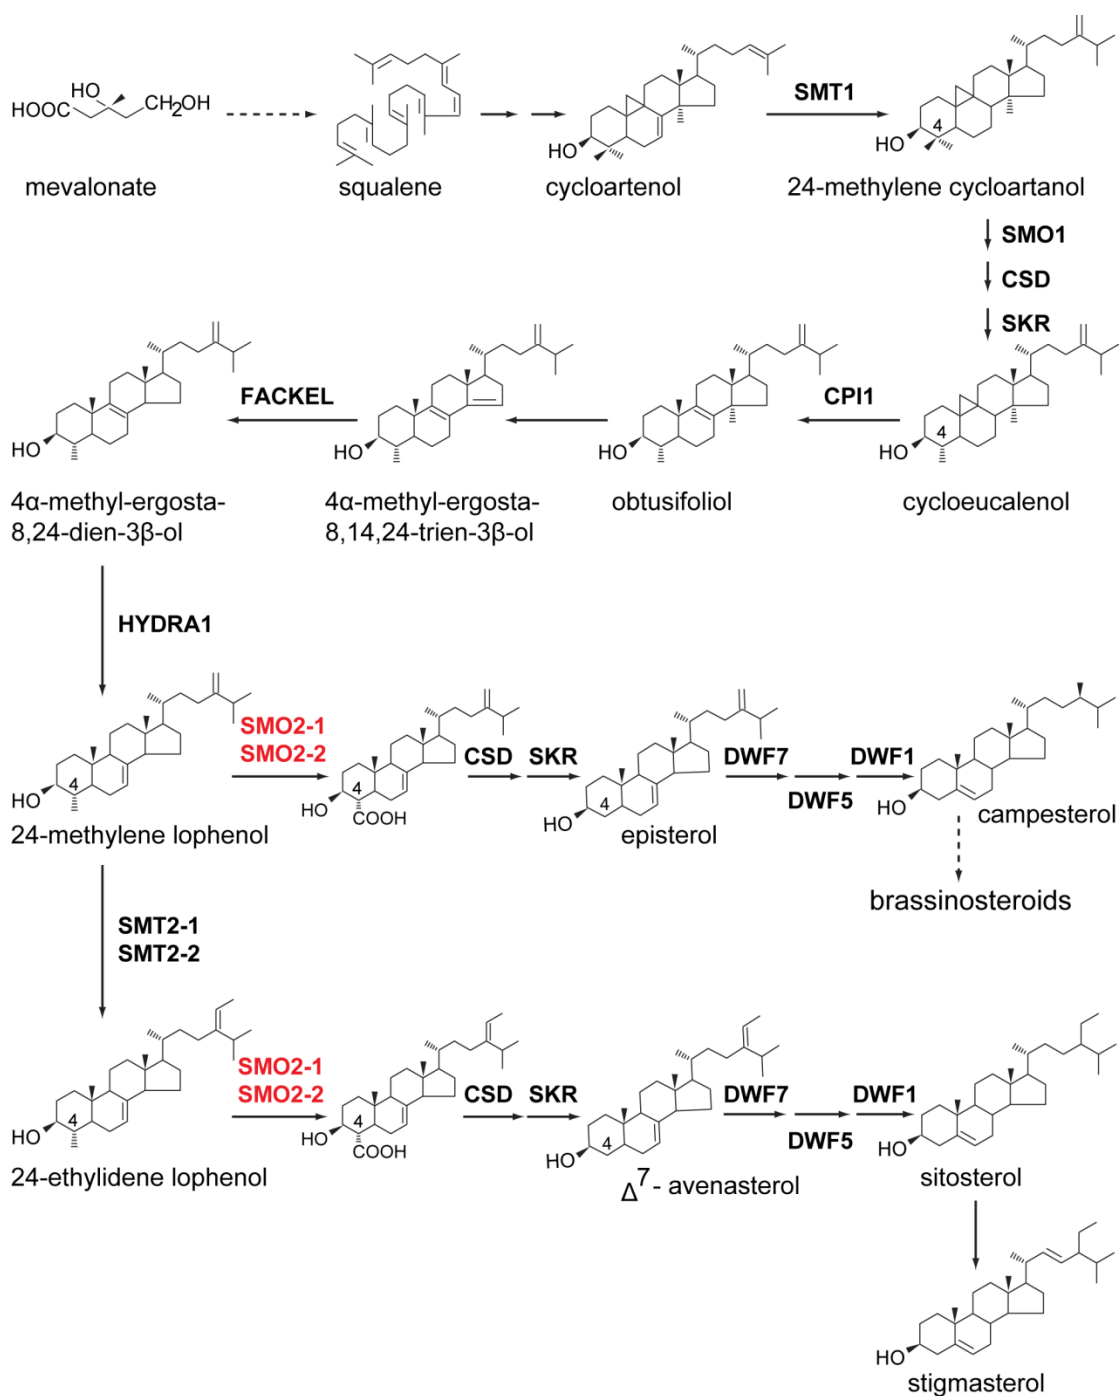

**Supplemental Figure S1.** Sterol biosynthetic pathway in higher plants. Arrows with dashed lines represent several biosynthetic steps. Abbreviations: SMT, sterol methyltransferase; SMO, sterol 4 $\alpha$ -methyl oxidase; CPI1, cyclopropylsterol isomerase1; CSD, 4 $\alpha$ -carboxysterol-C-3-dehydrogenase/C-4-decarboxylase; SKR, sterone ketoreductase; FACKEL,  $\Delta^{8,14}$ -sterol C-14-reductase; HYDRA1,  $\Delta^8$ -sterol 8,7-isomerase; DWF7,  $\Delta^7$ -sterol C-5 desaturase; DWF5,  $\Delta^7$ -sterol C-7 reductase; DWF1, C-24 reductase.



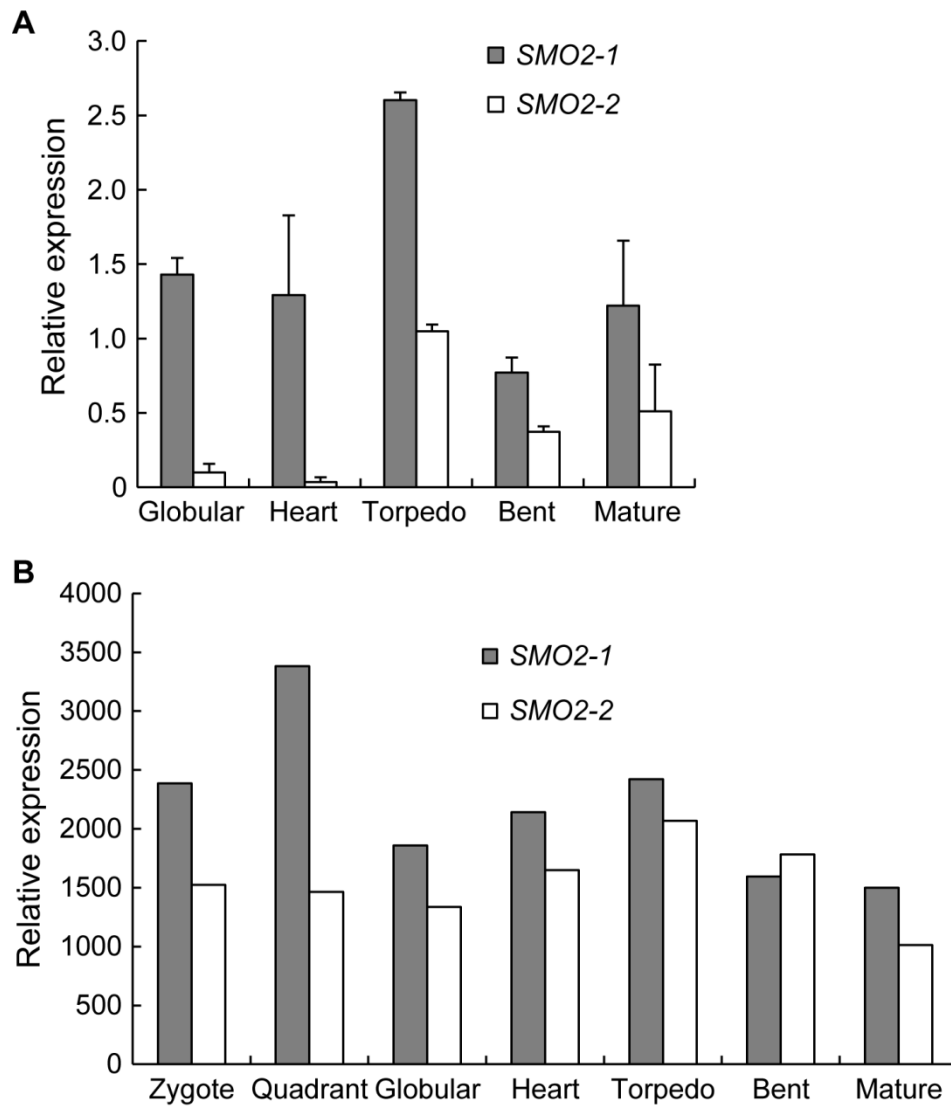

**Supplemental Figure S3.** Relative transcript levels of the *SMO2-1* and *SMO2-2* genes in developing *Arabidopsis* seeds and embryos. A. Relative transcript levels of the *SMO2-1* and *SMO2-2* genes in developing seeds. *Arabidopsis* seeds containing embryos at the globular, heart, torpedo, bent and mature stages were used for total RNA extraction. Transcript levels were determined by qRT-PCR. The average results of three experiments are shown. B. Relative transcript levels of the *SMO2-1* and *SMO2-2* genes in developing embryos. Gene expression data were downloaded from the “Gene Expression Map of *Arabidopsis* Embryo Development” database (<http://www2.bri.nrc.ca/plantembryo>). A relative expression value less than 777.6 indicates expression at very low levels or represents background; the data represent the normalized values of four replicates.

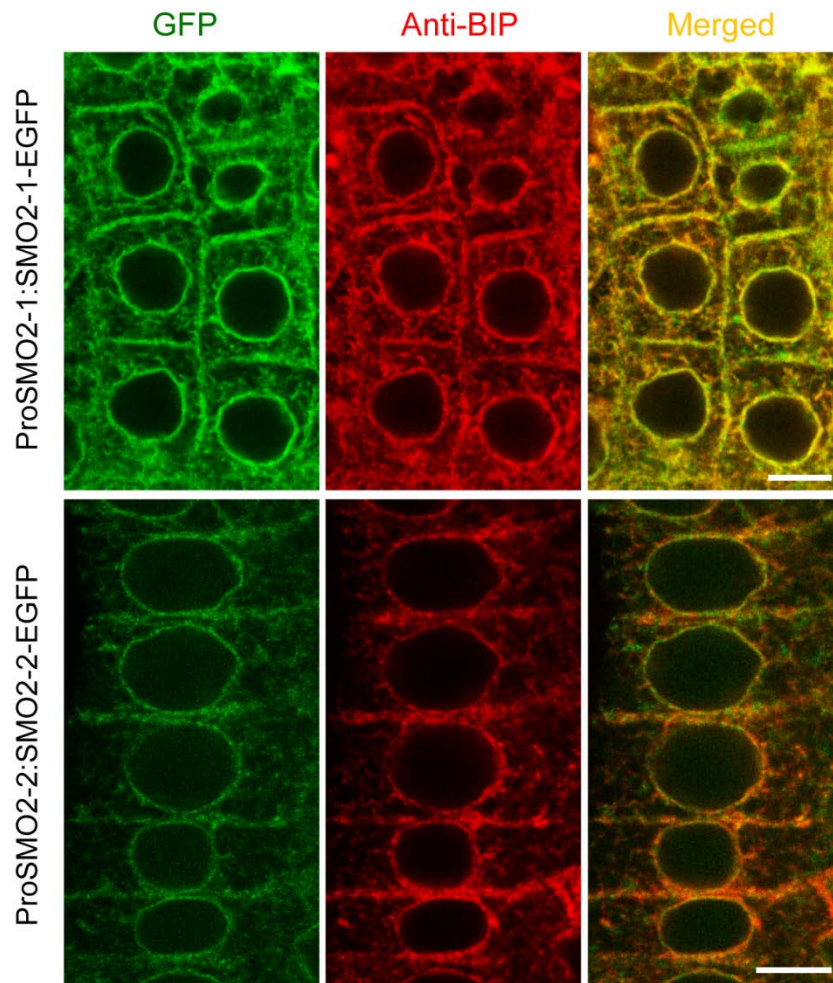

**Supplemental Figure S4.** ER localization of the SMO2-1 and SMO2-2 proteins. The *ProSMO2-1:SMO2-1-EGFP* and *ProSMO2-2:SMO2-2-EGFP* constructs were transformed into wild-type plants, and immunolocalization was performed on roots of transgenic plants using an anti-BiP (an ER-intrinsic chaperone used as a positive ER marker) antibody. Root cells were viewed under confocal microscopy. Bars = 10  $\mu\text{m}$ .

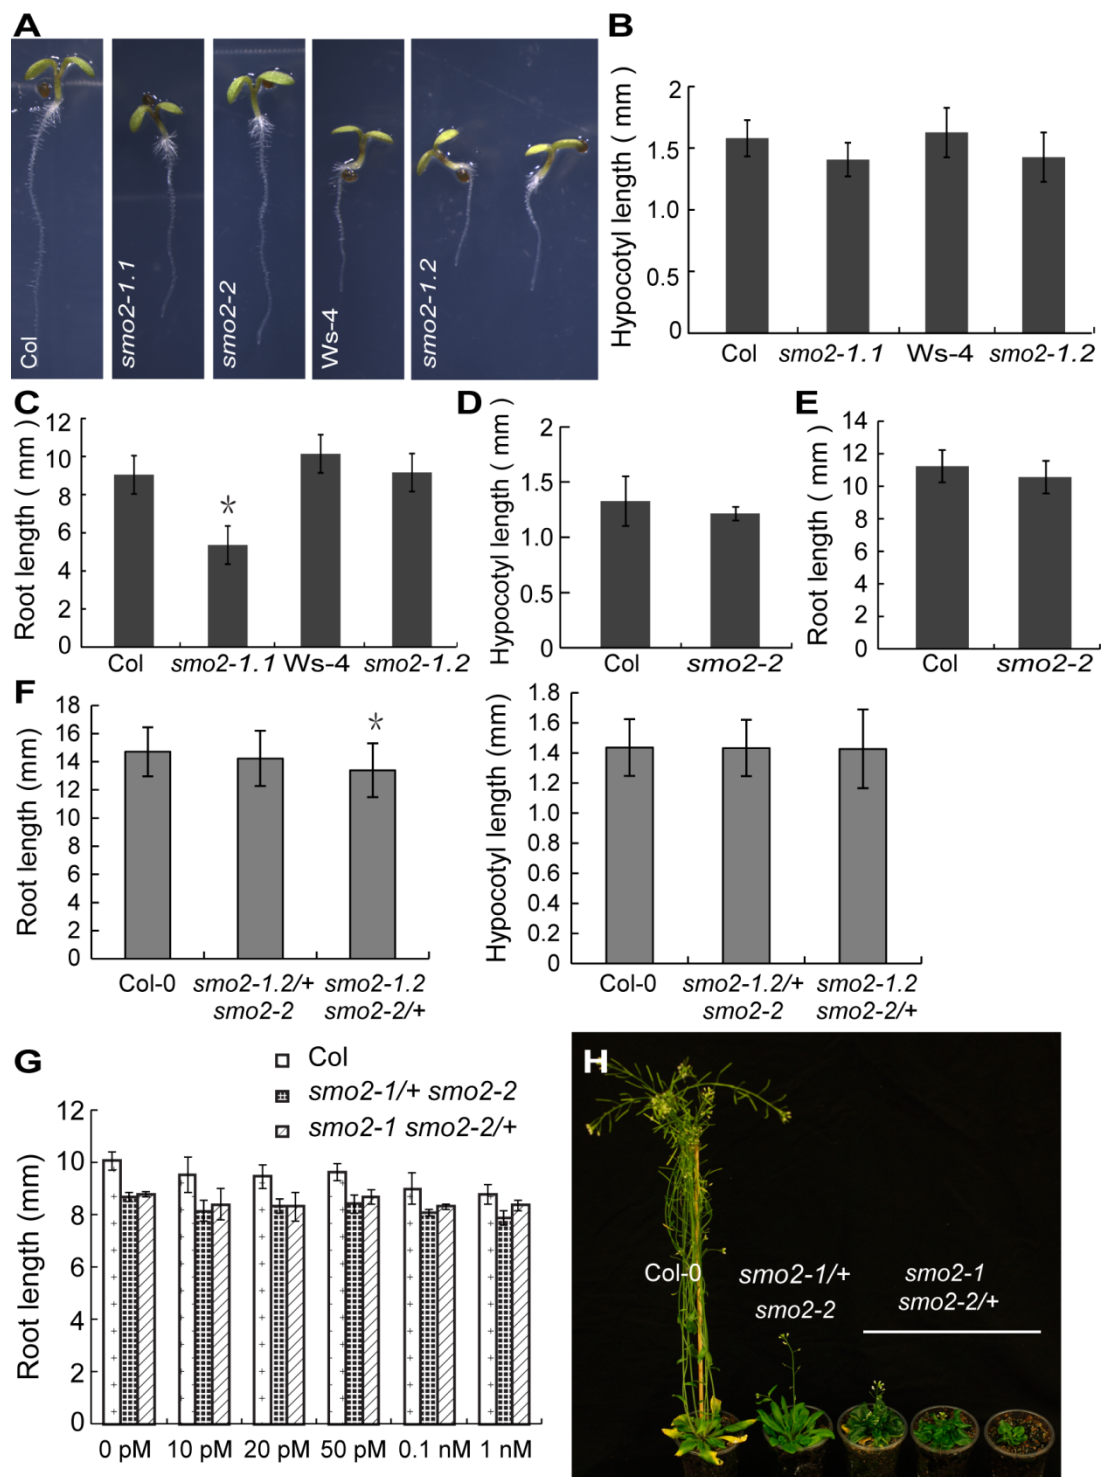

**Supplemental Figure S5.** Phenotypes of *smo2* mutants. A, Five-day-old seedling phenotypes of *smo2-1* and *smo2-2* single mutants grown under 16 h-light and 8 h-dark growth conditions. B to E, Hypocotyl and root lengths of 5-day-old wild-type (Col and Ws-4), *smo2-1*, and *smo2-2* seedlings. The data from three independent experiments are presented as the means  $\pm$  SD (n = 20 for each experiment). Asterisk indicates a P value < 0.05 compared with wild type. F, Hypocotyl and root lengths of 5-day-old wild-type (Col), *smo2-1.2/+ smo2-2*, and *smo2-1.2 smo2-2/+* seedlings. N = 21. Asterisk indicates

a P value < 0.05 compared with wild type. G, Root lengths of wild-type, *smo2-1/+ smo2-2* and *smo2-1 smo2-2/+* seedlings grown on MS plates with the addition of 0 pM, 10 pM, 20 pM, 50 pM, 0.1 nM and 1 nM 24-epibrassinolide (BL) for 5 days. The data from three independent experiments are presented as the means  $\pm$  SD (n = 10 to 27 for each experiment). H, Phenotypes of 8-week-old plants. Note the phenotypic variability within the *smo2-1 smo2-2/+* mutant plants.



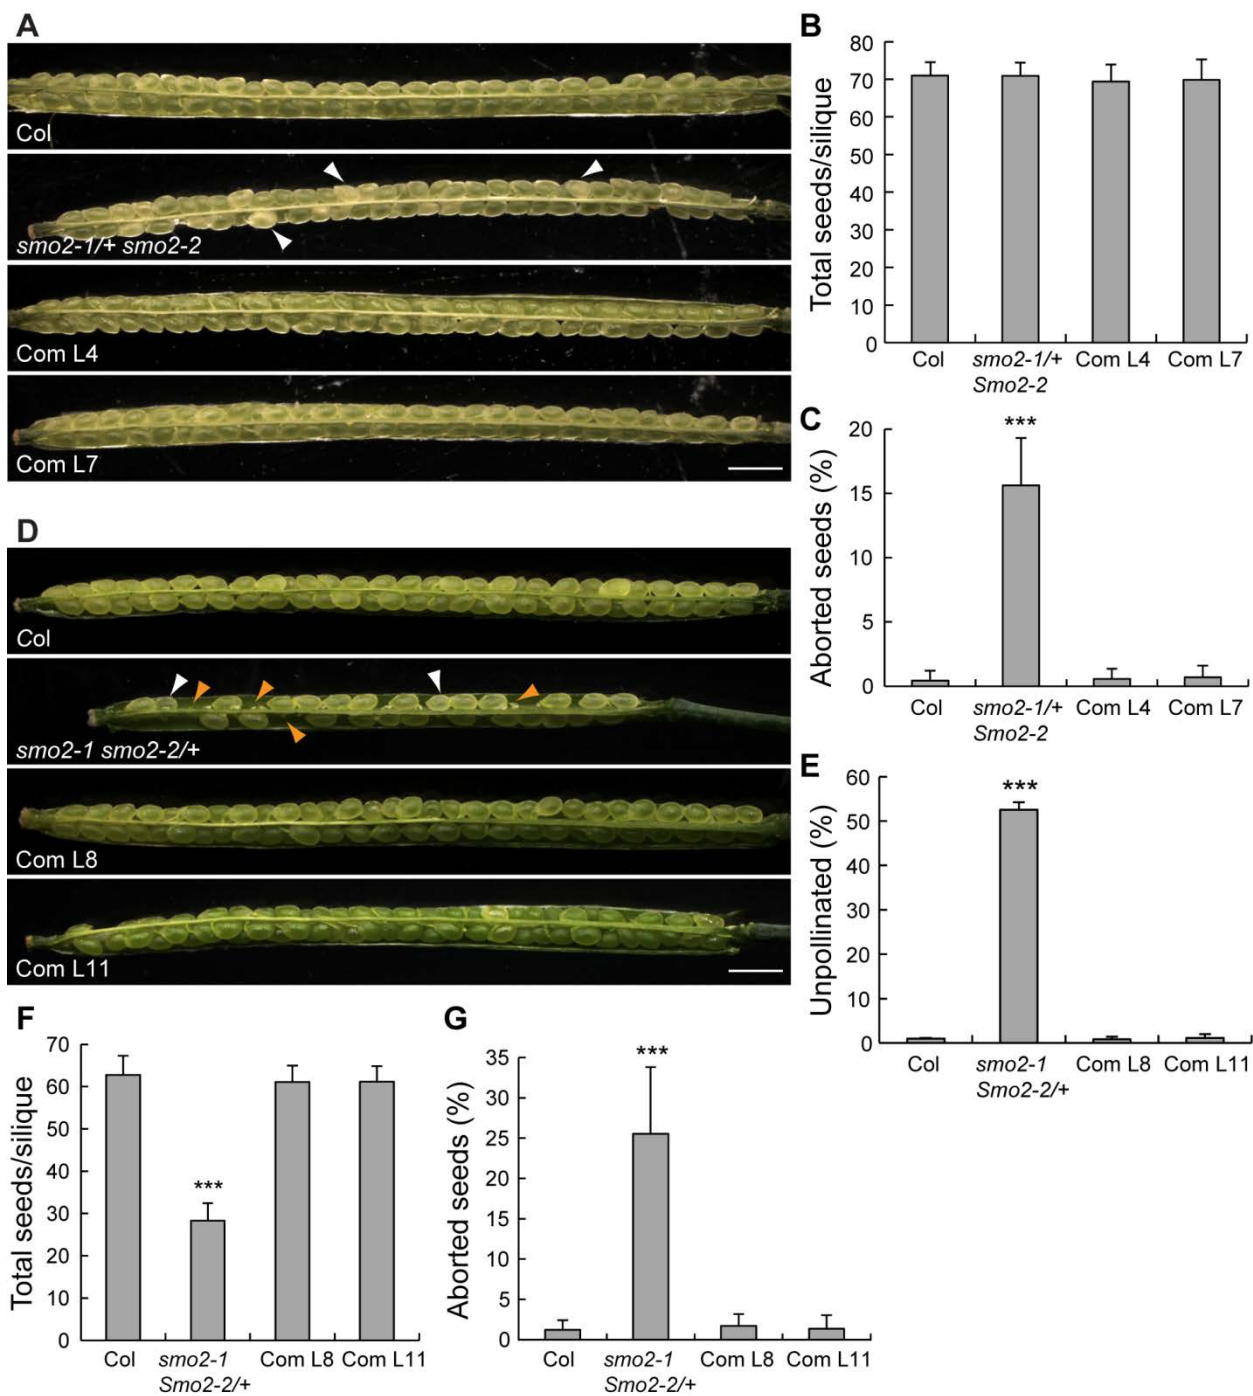

**Supplemental Figure S6.** *smo2-1/+ smo2-2* and *smo2-1 smo2-2/+* complementation experiments. A, Siliques 6-8 days after pollination from wild-type, *smo2-1/+ smo2-2*, and *ProSMO2-2:SMO2-2-EGFP* transgenic lines 4 (Com L4) and 7 (Com L7) in a *smo2-1 smo2-2* homozygous background. B and C, Quantification of total and aborted seeds in siliques from wild-type, *smo2-1/+ smo2-2*, and complemented lines 4 and 7. D, Siliques from wild-type, *smo2-1 smo2-2/+*, and *ProSMO2-1:SMO2-1-EGFP* transgenic lines 8 (Com L8) and 11 (Com L11) in a *smo2-1 smo2-2* homozygous background. E to G, Quantification of unpollinated ovules and total and aborted seeds in siliques from wild-type, *smo2-1 smo2-2/+*, and complemented lines 8 and 11. The data were derived from three experiments and are presented as the means  $\pm$  SD. For each experiment, 10 siliques from 5 plants were examined. Significant differences were analyzed using Student's t-test (\*\*\*)  $P < 0.001$ ). White arrowheads indicate aborted seeds, and orange arrowheads indicate undeveloped ovules. Bars = 1 mm.

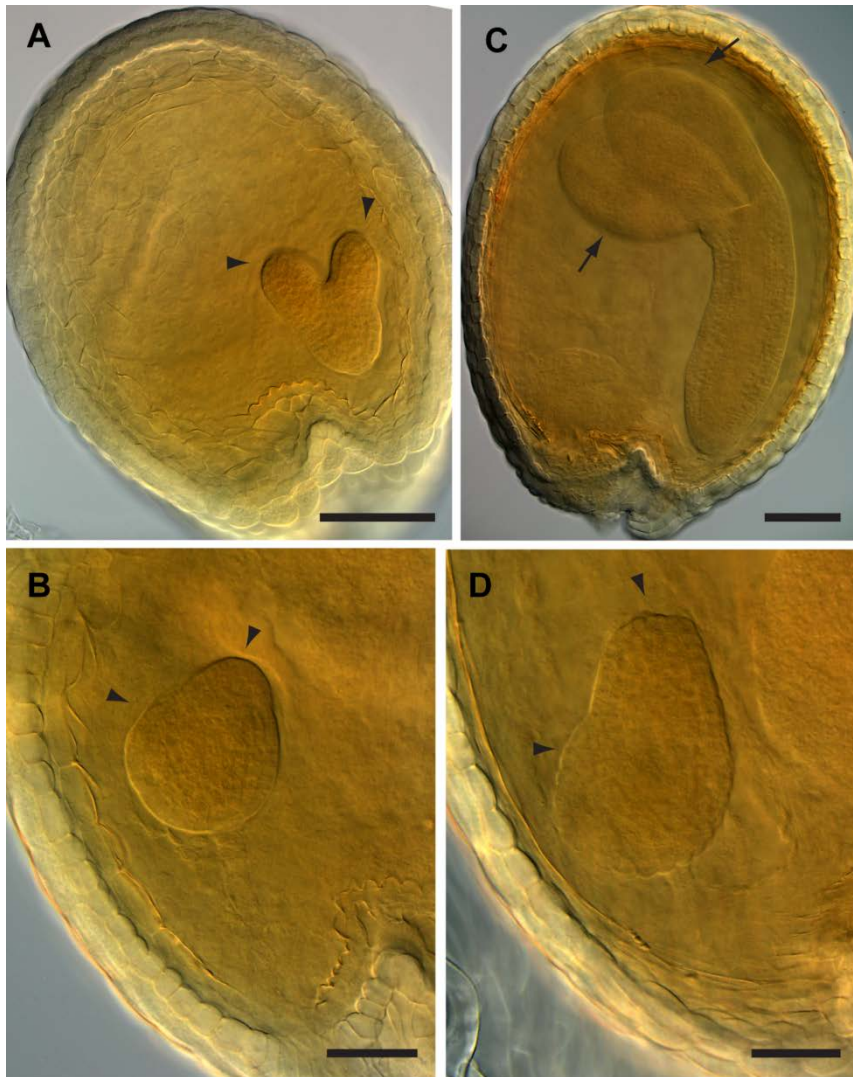

**Supplemental Figure S7.** Embryos of *smo2-1 smo2-2/+* plants have different cotyledon sizes. A, Seed with an embryo at the heart stage from the same silique as the seed shown in (B). B, Delayed double-mutant embryo at the early heart stage. Note that one cotyledon primordium is larger than the other. C, Seed with an embryo at the walking stick stage from the same silique as the seed shown in (D). D, Delayed double-mutant embryo at the heart-like stage. Note that one cotyledon tip is much larger than the other. Arrowheads indicate cotyledon primordia, and arrows indicate cotyledons. Bars = 50  $\mu$ m.



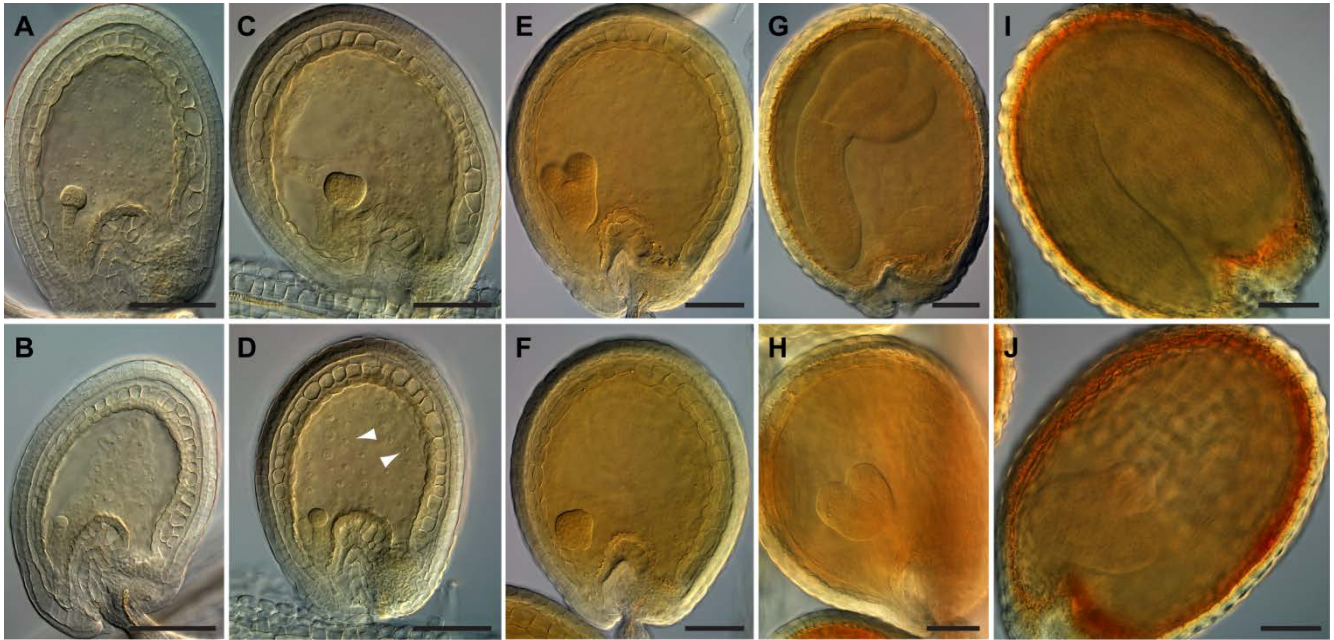

**Supplemental Figure S8.** Embryonic development of *smo2-1 smo2-2/+* mutants. A, Seed containing an embryo at the early globular stage from the same silique as the seed shown in (B). B, Delayed mutant embryo at the two-cell stage. C, Seed with an embryo at the triangular stage from the same silique as the seed shown in (D). D, Delayed mutant embryo at the eight-cell stage with a short suspensor. Arrowheads indicate degenerating endosperm nuclei. E, Seed with an embryo at the heart stage from the same silique as the seed shown in (F). F, Delayed mutant embryo at the triangular stage. G, Seed with an embryo at the walking stick stage from the same silique as the seed shown in (H). H, Abnormal embryo that could be classified as the heart-like stage. I, Seed containing a mature embryo from the same silique as the seed shown in (J). J, Abnormal embryo that could be classified as the heart-like stage. Bars = 100  $\mu$ m.

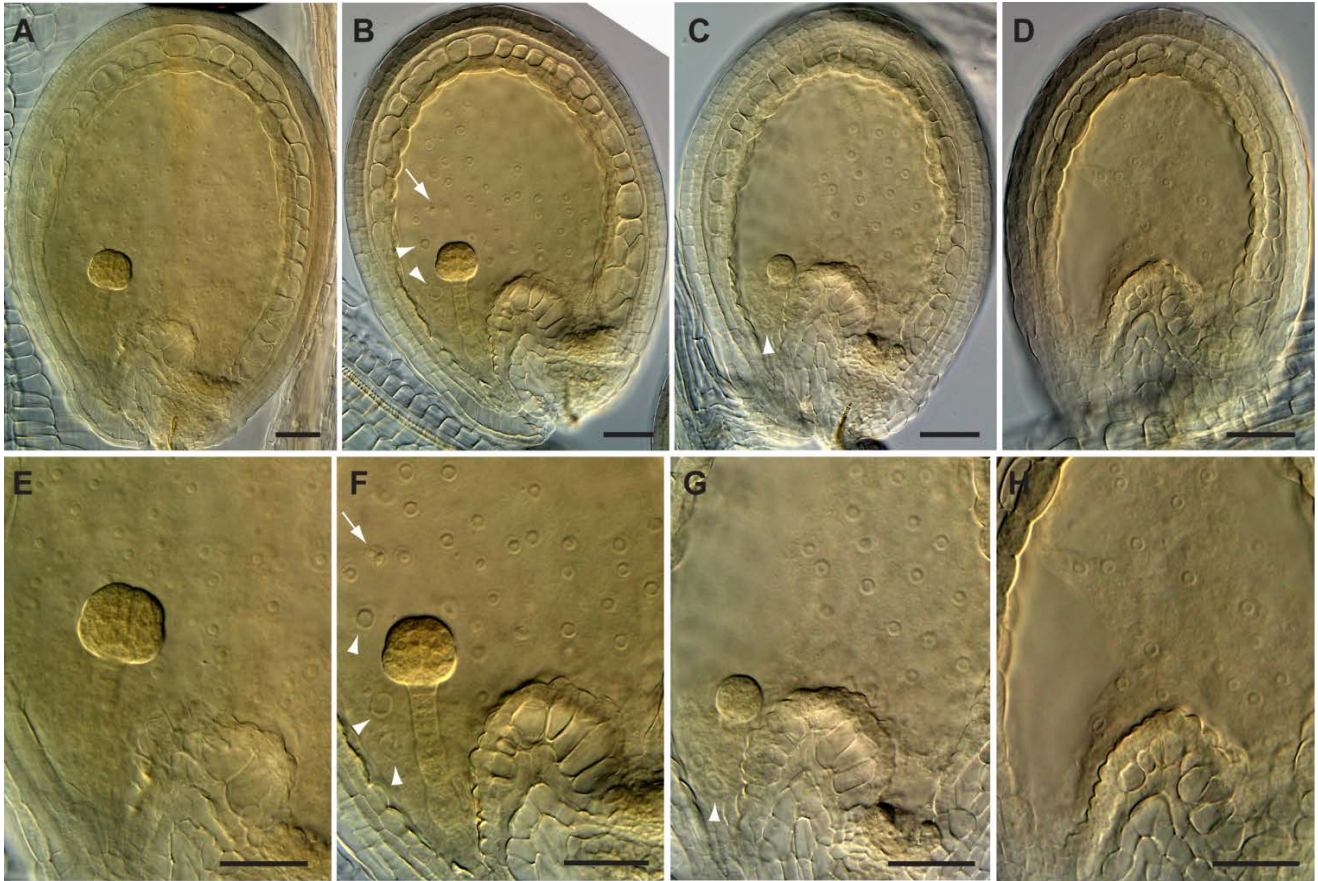

**Supplemental Figure S9.** Embryonic and endosperm defects of *smo2-1 smo2-2/+* seeds. Cleared seeds from a silique 3 days post-anthesis from the *smo2-1 smo2-2/+* mutant are shown. A, Seed containing a normal globular-stage embryo and properly proliferating endosperm nuclei. B, Seed containing a normal globular-stage embryo but delayed endosperm proliferation and enlarged endosperm nuclei. C, Seed with delayed embryonic and endosperm development. D, Seed with only endosperm nuclei but no embryo. E to H, Enlarged images of the embryos and endosperm nuclei shown in (A-D). Arrowheads indicate large endosperm nuclei, and arrows indicate dividing endosperm nuclei. Bars = 50  $\mu$ m.

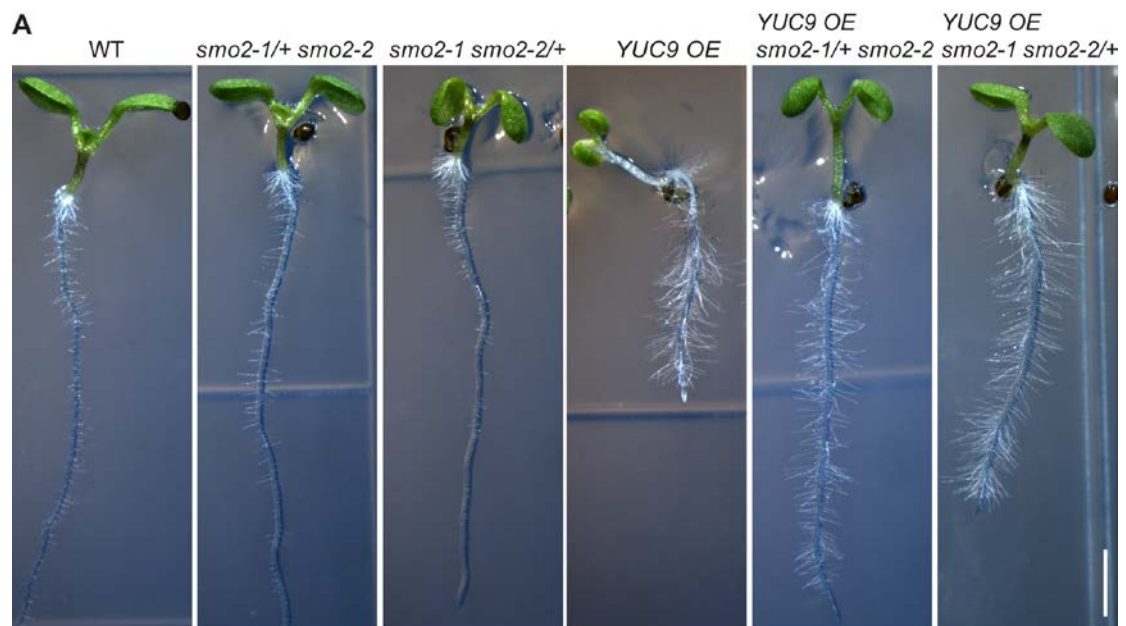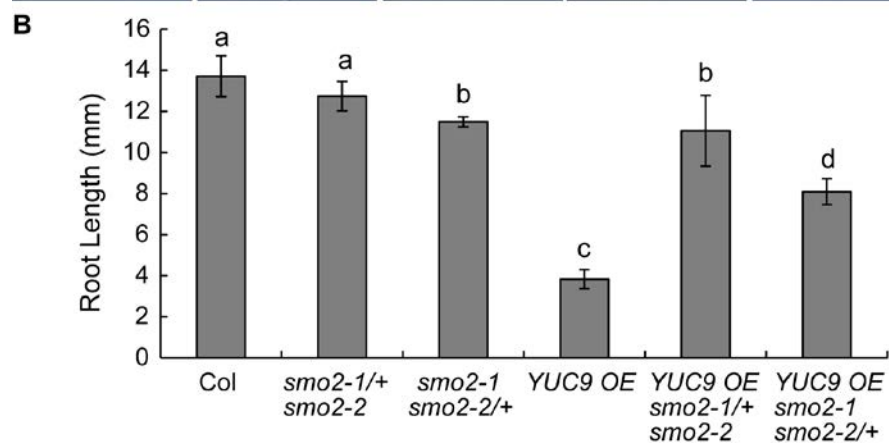

**Supplemental Figure S10.** *smo2-1/+ smo2-2* and *smo2-1 smo2-2/+* mutants suppressed the short root phenotype of *YUC9* OE seedlings. A, Phenotypes of 6-day-old seedlings. Bar = 0.1 mm. B, Root length of 6-day-old seedlings. The data were derived from three experiments and are presented as the means  $\pm$  SD ( $n = 15$  for each experiment). Bars in each column with different letters differ significantly (Student's *t*-test,  $P < 0.05$ ).



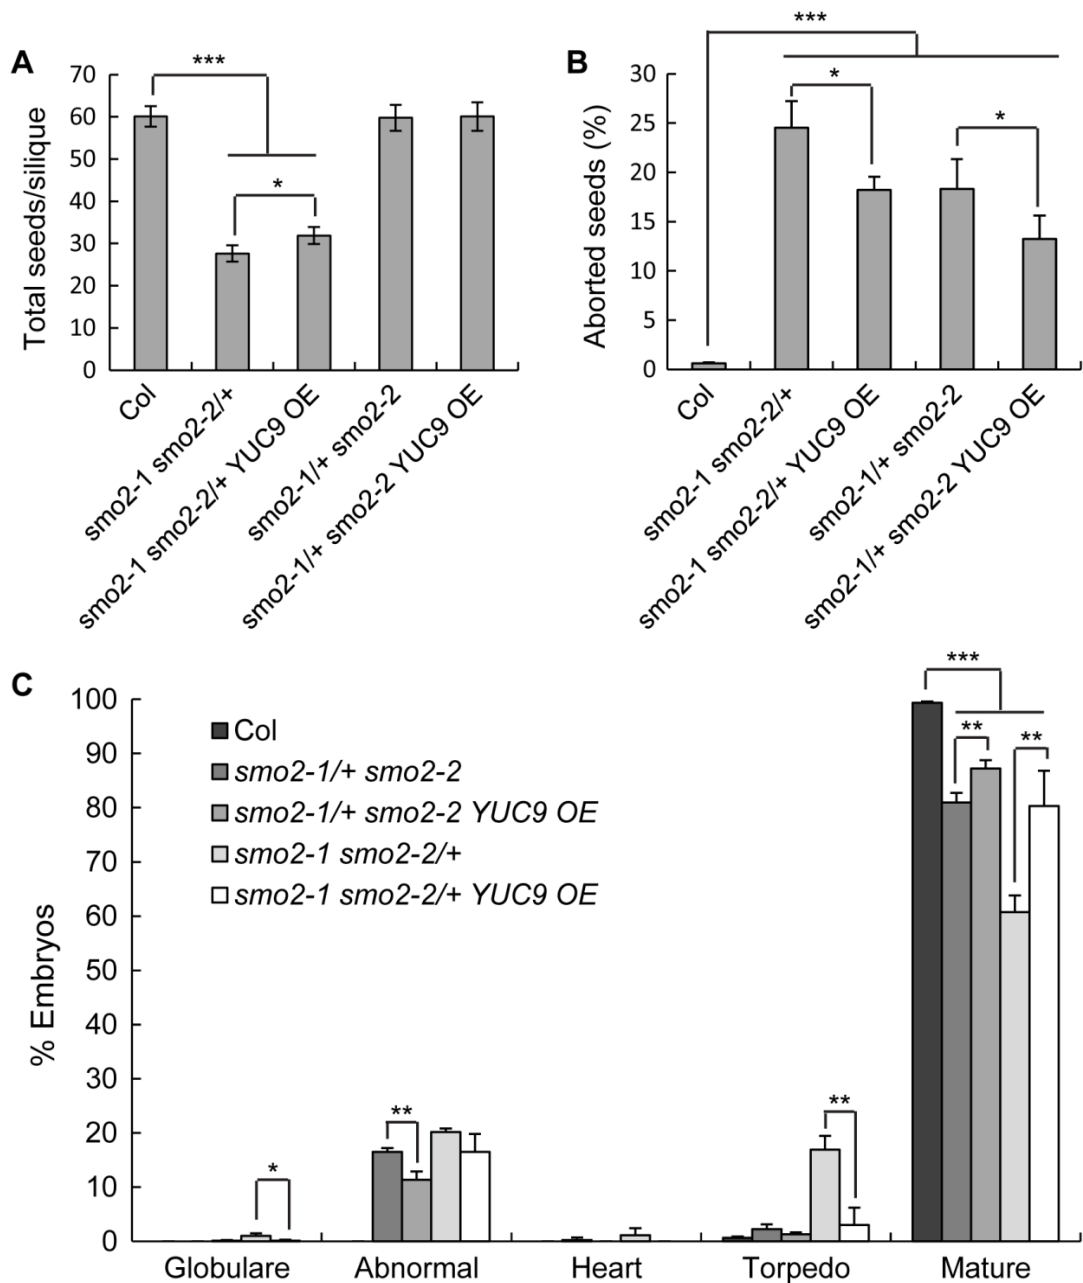

**Supplemental Figure S11.** *YUC9* OE partially rescues *smo2-1 smo2-2* embryonic lethality. A and B, Quantification of total and aborted seeds in siliques of the indicated genotypes. C, Embryonic developmental stage quantification of seeds from siliques 10 days after pollination. The average results of 3 experiments are shown. Seeds from 15 siliques were examined for each experiment in (A) and (B), and seeds from 10 siliques were examined for each experiment in (C). \* $P < 0.05$ , \*\*  $P < 0.01$ , \*\*\* $P < 0.001$ , Student's t-test.

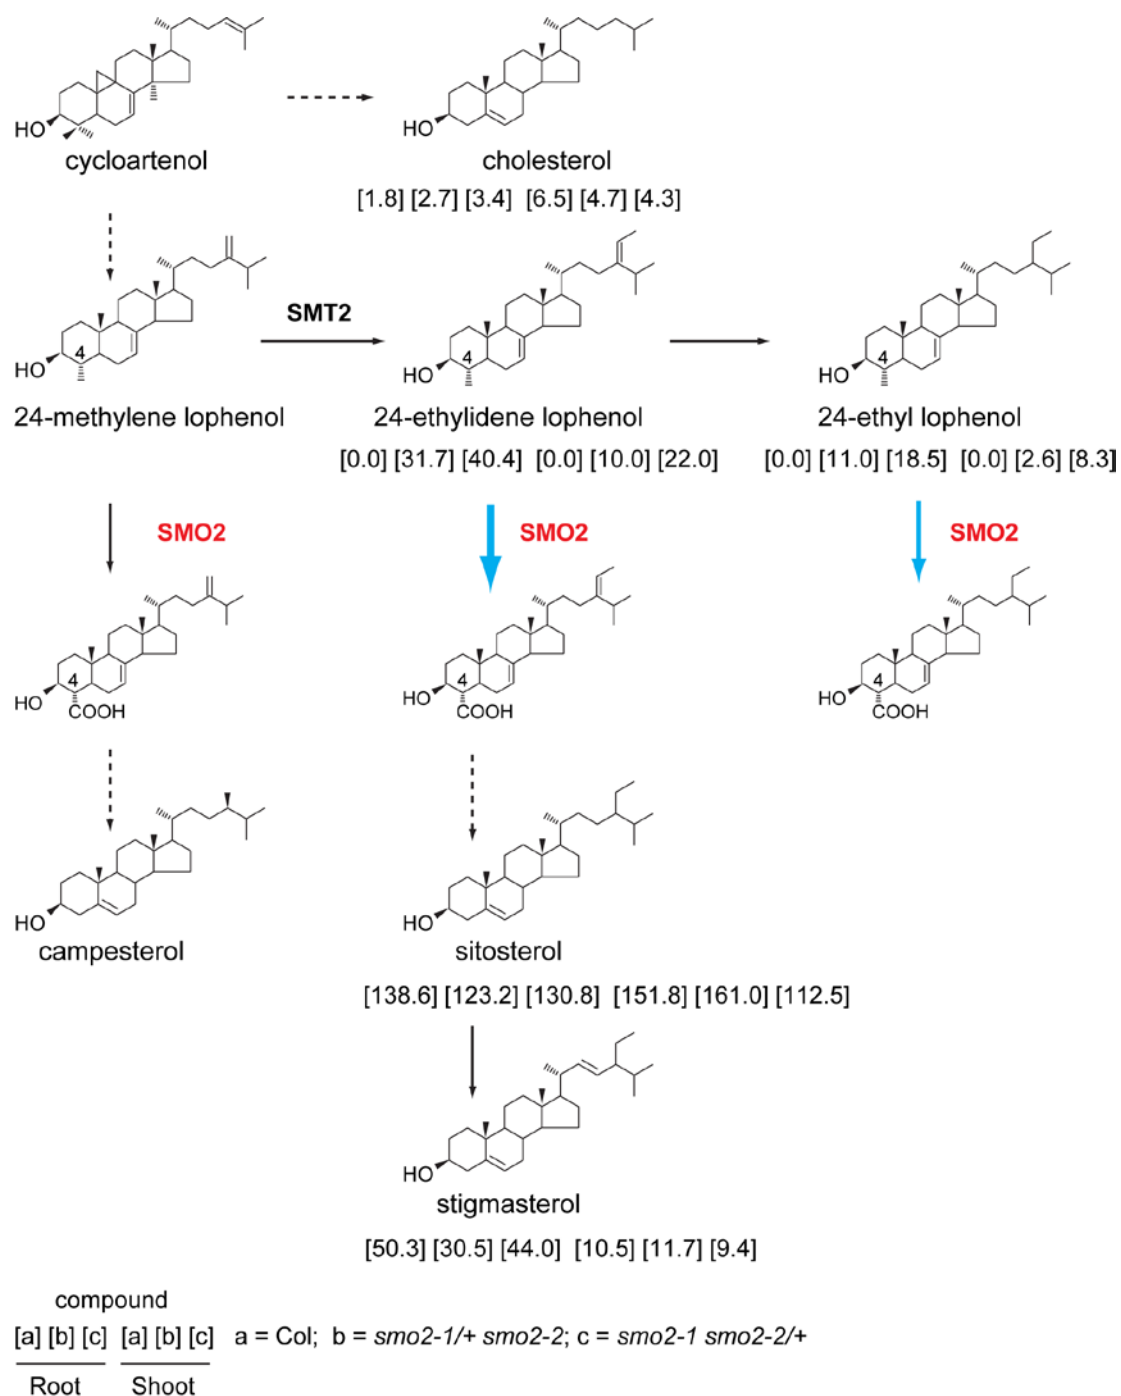

**Supplemental Figure S12.** Accumulation of SMO2 substrates in *smo2-1/+ smo2-2* and *smo2-1 smo2-2/+* mutants. Values shown are the content of each compound (ng/mg fresh weight) in roots and shoots of wild-type (Col), *smo2-1/+ smo2-2* and *smo2-1 smo2-2/+* mutants. Arrows with dashed lines represent several biosynthetic steps. Blue arrows indicate reactions that were evidenced by the accumulation of precursor compounds in *smo2-1/+ smo2-2* and *smo2-1 smo2-2/+* mutants. The thickness of the arrow represents substrate preference as revealed by the level of accumulation of precursors.



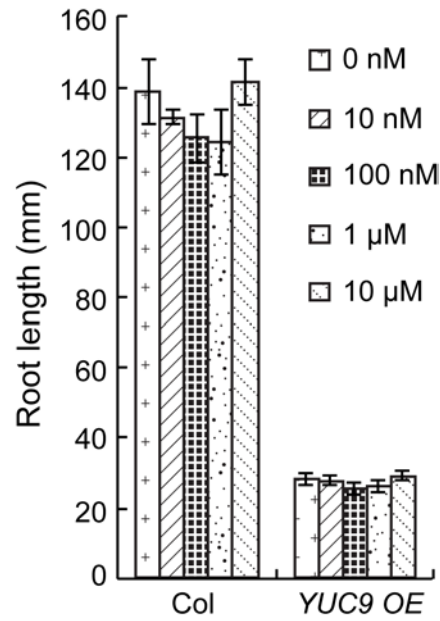

**Supplemental Figure S13.** The SMO2 substrate 24-ethylidene lophenol has no effects on root growth of either wild-type or *YUC9* OE seedlings. The root lengths of 5-day-old wild-type and *YUC9* OE seedlings grown on MS medium supplemented with 0 nM, 10 nM, 100 nM, 1 μM and 10 μM 24-ethylidene lophenol are shown. The values represent averages of three biological replicates (n = 9 to 19 for each experiment).

**Supplemental Table S1.** Primers used in this study.

| Purpose                    | Primer name           | Primer sequence 5'→ 3'              |
|----------------------------|-----------------------|-------------------------------------|
| Genotyping                 | LBa1                  | TGGTTCACGTAGTGGGCCATC               |
|                            | FLAG_RB4              | TCACGGGTTGGGGTTTCTAC                |
|                            | SMO2-1_F1(1270bp)     | GCATCATGAAAGAACCTGAGC               |
|                            | SMO2-1_R1(2256bp)     | AATAGGCCACACGAGCAGCA                |
|                            | SMO2-1(SAK-105017)-F2 | GATGTGTTAGCAATAGCATTCA              |
|                            | SMO2-1(SAK-105017)-R2 | ACTCCCAATACATGCCAGTTG               |
|                            | SMO2-2_F1(-61)        | CACACTCTCTGCCTATCTCCG               |
|                            | SMO2-2_R1(1134)       | CCAGGACGGCAGAGGAAAAC                |
| SMO2-1 promoter cloning    | SMO2-1_pF(-742)XhoI   | GACGCTCGAGACTATAGTGATTACTAATCAATCA  |
|                            | SMO2-1_pR(-21)HindIII | GACGAAGCTTGGATGGATCTATGAGAGACAG     |
| SMO2-1 terminator cloning  | SMO2-1_tF(2124)NotI   | GACGGCGGCCGCAATTGCCACTTTGGATTGCAG   |
|                            | SMO2-1_tR(3221)SacI   | GAGAGCTCCACTAATCTCCTCATCACTC        |
| SMO2-1 genomic DNA cloning | SMO2-1_F2_-742_KpnI   | GCGGGTACCCTACTATAGTGATTACTAATCAATCA |
|                            | SMO2-1_R2_2121_XhoI   | CGGCCTCGAGCGTTTGTTCATGTCACCGTT      |
| SMO2-1 RT-PCR              | SMO2-1_F5_-103        | ATTTTGGTGACAGTCTGTTGTT              |
|                            | SMO2-1_R5_2388        | TACAGAAAAATGAGACAAGGATA             |
| SMO2-2 promoter cloning    | SMO2-2_F3_-992_XhoI   | GCTGCTCGAGTGACACCGATTATCCAGTGAC     |
|                            | SMO2-2_R3_-1_HindIII  | GCGAAGCTTGGATACCAACAGAAGTAGAAAAC    |
| SMO2-2 terminator cloning  | SMO2-2_F4_2036_NotI   | AGCGGCGGCCGCACCTGACAACAAACAAACGTGA  |
|                            | SMO2-2_R4_2678_SacI   | GCGGAGCTCTAAGGACACGTAAGTGGACAC      |
| SMO2-2 genomic DNA cloning | SMO2-2_F5_-992_KpnI   | GCGGGTACCTGACACCGATTATCCAGTGAC      |
|                            | SMO2-2_R5_2036_XhoI   | CGGCCTCGAGTTCTTTTAGGGCCTTAAGTTTC    |
| SMO2-2 RT-PCR              | SMO2-2_F2_-95         | GTCACACAGTTTTTCGTTTCTCT             |
|                            | SMO2-2_R2_2257        | AGTAGTAACAACAAGTCCAATAG             |
| ACTIN2 RT-PCR reference    | ACTIN2_F1_266         | GAGCATGGTGTGTTAGCAAC                |
|                            | ACTIN2_R1_866         | CAGCACCAATCGTGATGACTT               |
| SMO2-1 qRT-PCR             | SMO2-1_qRT-F          | TGGAATCTGGTTGGCAGTACC               |

|                        |              |                           |
|------------------------|--------------|---------------------------|
|                        | SMO2-1_qRT-R | AGGGTAGGAGGCCAACATCAG     |
| SMO2-2 qRT-PCR         | SMO2-2_qRT-F | CGTTGAATCCGGTTGGAAGT      |
|                        | SMO2-2_qRT-R | GGGCAAGTTTACGCAGCAA       |
| TIP41 qRT-PCR referenc | TIP41_qRT-F  | GTATGAAGATGAACTGGCTGACAAT |
|                        | TIP41_qRT-R  | ATCAACTCTCAGCCAAAATCGCAAG |

Introduced restriction enzyme site are underlined.
